# Supplementary material
Source: PubMed Central journal article supplement (PMC6237449)

Full unedited gel for Figure 3B

IB: ATP12A

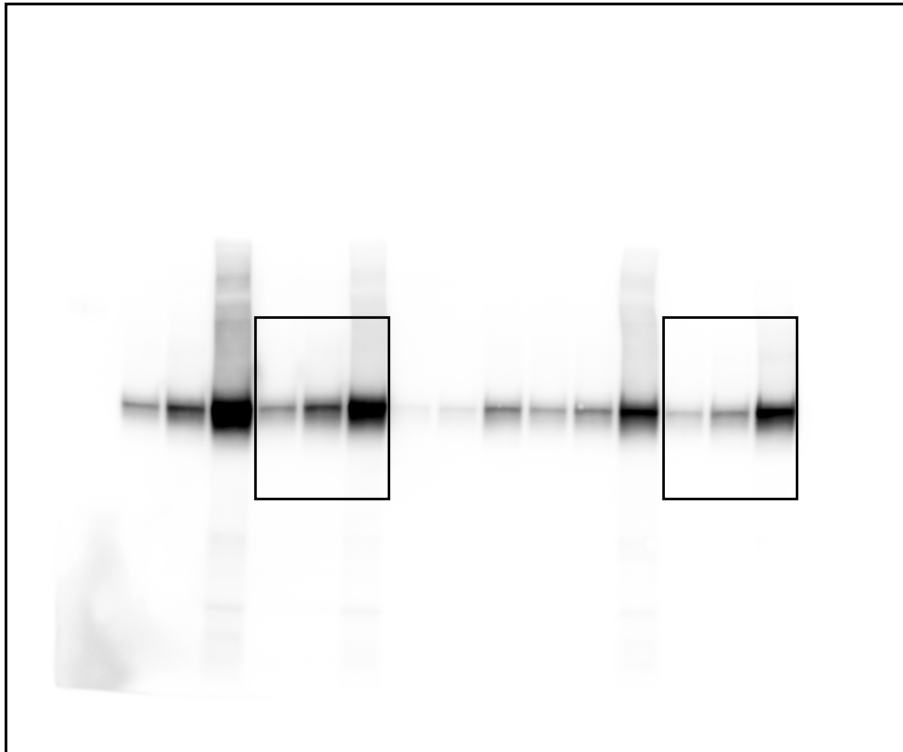

IB: GAPDH

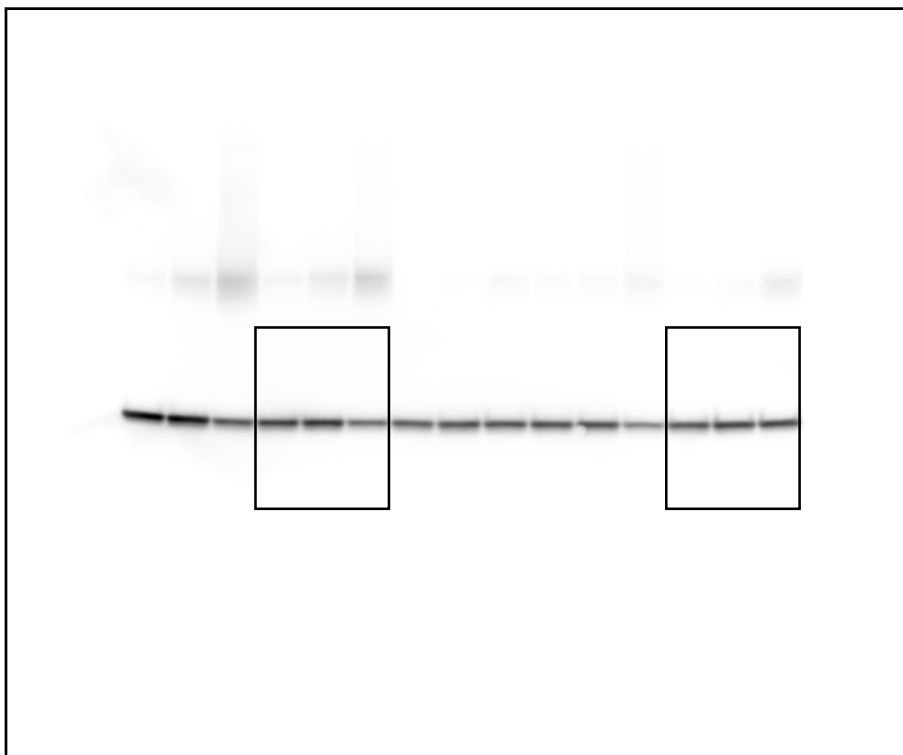

Supplement: jciinsight-3-123616-s116.pdf [file jciinsight-3-123616-s116.pdf]
